# Supplementary material for: A hybrid short read mapping accelerator
Source: Springer Nature journal article supplement (doi:10.1186/1471-2105-14-67), 2013-02-26
Supplement: 12859_2012_5717_MOESM1_ESM.pdf [file 12859_2012_5717_MOESM1_ESM.pdf]

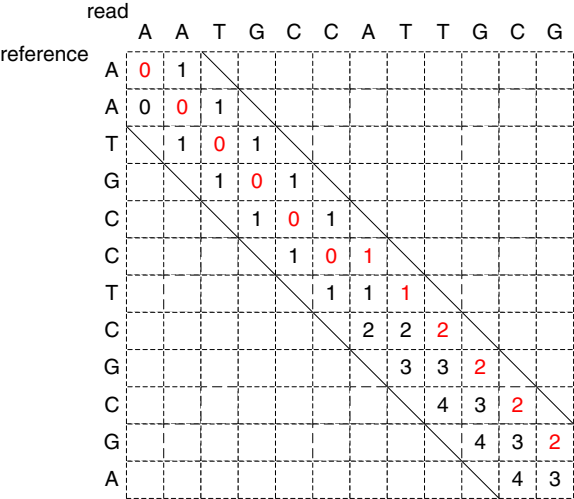

read A A T G C C A T T G C G

| | | | | | | | | | |

reference A A T G C C — T C G C G

Alignment score = 2
