# Supplementary material for: A hybrid short read mapping accelerator
Source: Springer Nature journal article supplement (doi:10.1186/1471-2105-14-67), 2013-02-26

substitution matrix in the  
block

|   |   |   |   |
|---|---|---|---|
| 1 | 0 | 1 | 0 |
| 0 | 0 | 1 | 1 |
| 1 | 0 | 1 | 1 |

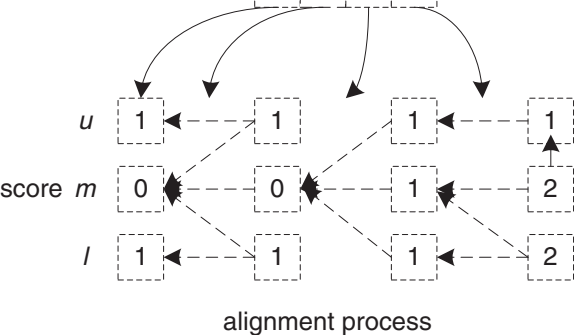

Supplement: 12859_2012_5717_MOESM3_ESM.pdf [file 12859_2012_5717_MOESM3_ESM.pdf]
