# Supplementary material for: A hybrid short read mapping accelerator
Source: Springer Nature journal article supplement (doi:10.1186/1471-2105-14-67), 2013-02-26
Supplement: 12859_2012_5717_MOESM4_ESM.pdf [file 12859_2012_5717_MOESM4_ESM.pdf]

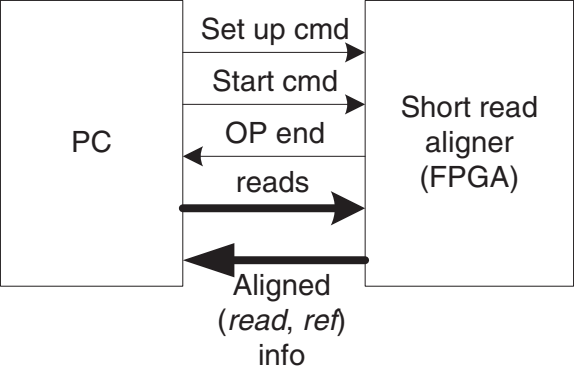

PC

Set up cmd

Start cmd

OP end

reads

Aligned  
(*read, ref*)  
info

Short read  
aligner  
(FPGA)
