# Supplementary material for: A hybrid short read mapping accelerator
Source: Springer Nature journal article supplement (doi:10.1186/1471-2105-14-67), 2013-02-26

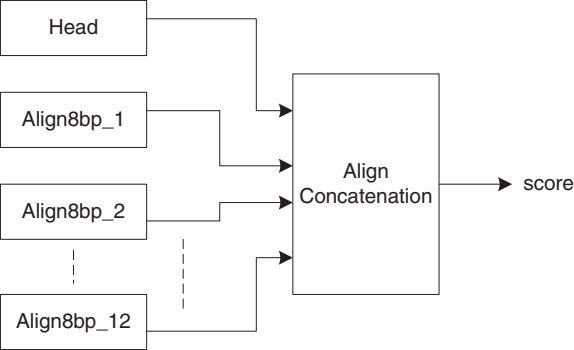

Supplement: 12859_2012_5717_MOESM9_ESM.pdf [file 12859_2012_5717_MOESM9_ESM.pdf]
